# Supplementary material for: Fluorimetric Analysis of Five Amino Acids in Chocolate: Development and Validation
Source: MDPI journal article supplement (doi:10.3390/molecules26144325), 2021-07-16
Supplement: s1 [file s1]

# Fluorimetric analysis of five amino acids in chocolate: Development and validation

Maria S. Synaridou <sup>1</sup>, Vasilis Tsamis <sup>1</sup>, Georgia Sidiropoulou <sup>1</sup>, Constantinos K. Zacharis <sup>1</sup>, Irene Panderi <sup>2</sup> and Catherine K. Markopoulou <sup>1,\*</sup>

<sup>1</sup> Laboratory of Pharmaceutical Analysis, Department of Pharmaceutical Technology, School of Pharmacy, Aristotle University of Thessaloniki, 54124, Greece; msynarid@pharm.auth.gr (M.S.S.); vasilistsm@gmail.com (V.T); sgeorgiae@gmail.com (G.S.); czacharis@pharm.auth.gr (C.K.Z.); amarkopo@pharm.auth.gr (C.K.M.)

<sup>2</sup> National and Kapodistrian University of Athens, Faculty of Pharmacy, Laboratory of Pharmaceutical Analysis, Panepistimiopolis, 15771, Athens, Greece; ipanderi@pharm.uoa.gr (I.P.)

\* Correspondence: amarkopo@pharm.auth.gr (C.K.M); Tel.: +30 2310 997665

**Table S1.** Molecular structure, molecular weight, pKa and isoelectric point of amino acids.

| Amino acids        | Molecular structure                                                                 | Molecular weight (g/mol) | pKa (-COOH) | pKa (-NH <sub>3</sub> <sup>+</sup> ) | Isoelectric point (pI) |
|--------------------|-------------------------------------------------------------------------------------|--------------------------|-------------|--------------------------------------|------------------------|
| β-Alanine (Ala)    | 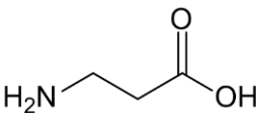  | 280.45                   | 2.34        | 9.69                                 | 6.02                   |
| L-Histidine (His)  |  | 155.15                   | 1.82        | 9.17                                 | 7.59                   |
| L-Valine (Val)     |  | 117.15                   | 2.32        | 9.62                                 | 5.97                   |
| L-Leucine (Ile)    |  | 131.17                   | 2.36        | 9.60                                 | 5.98                   |
| L-Isoleucine (Leu) |  | 131.17                   | 2.36        | 9.60                                 | 5.98                   |

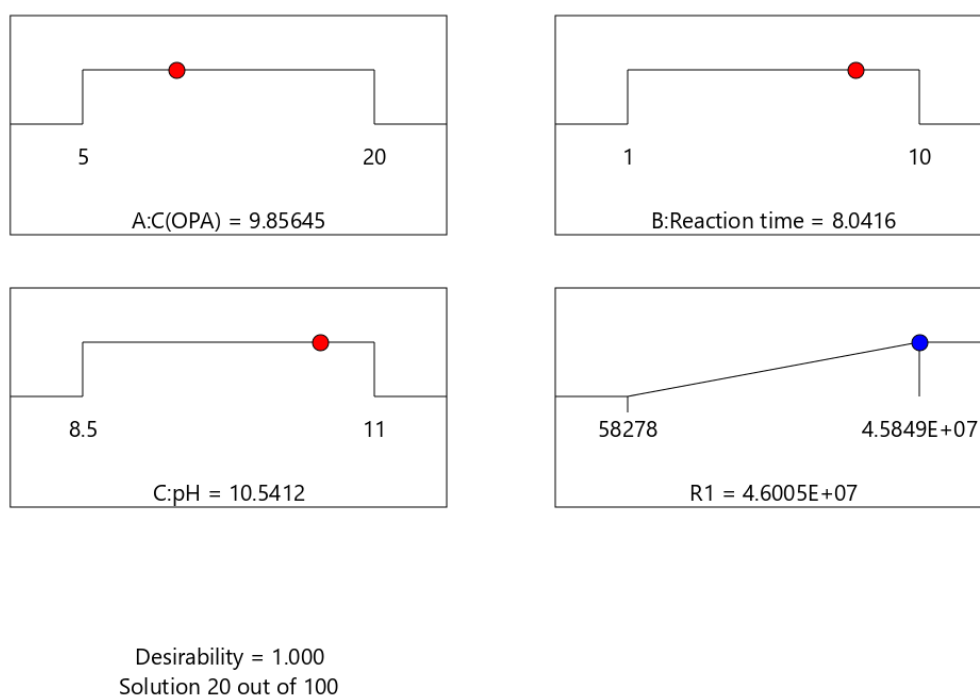

**Figure S1.** Ideal values of the parameters studied during the optimization of the OPA-amino acids' derivatization conditions.

**Table S2. A:** Design experiments and requirements used in the experimental design of LSE method.

| Name                   | Goal     | Lower Limit | Upper Limit | Lower Weight | Upper Weight | Importance |
|------------------------|----------|-------------|-------------|--------------|--------------|------------|
| A: Chocolate weight    | maximize | 500         | 1500        | 1            | 1            | 5          |
| B: Centrifugation time | minimize | 5           | 30          | 1            | 1            | 3          |
| C: Freezing time       | minimize | 30          | 90          | 1            | 1            | 3          |
| D: Ultrasonic time     | minimize | 5           | 30          | 1            | 1            | 3          |
| %Recovery Alanine      | maximize | 55          | 100         | 1            | 1            | 4          |
| %Recovery Histidine    | maximize | 61          | 100         | 1            | 1            | 4          |
| %Recovery Valine       | maximize | 55          | 99          | 1            | 1            | 4          |
| %Recovery Isoleucine   | maximize | 50          | 99          | 1            | 1            | 3          |
| %Recovery Leucine      | maximize | 60          | 100         | 1            | 1            | 3          |

**Table S2. B:** Conducted experiments for the optimization of LSE method.

| 1 <sup>st</sup> step: LSE – Experimental Design |     |                                         |                                             |                                       |                                         |
|-------------------------------------------------|-----|-----------------------------------------|---------------------------------------------|---------------------------------------|-----------------------------------------|
| Std                                             | Run | Factor 1<br>A: Chocolate weight<br>(mg) | Factor 2<br>B: Centrifugation time<br>(min) | Factor 3<br>C: Freezing time<br>(min) | Factor 4<br>D: Ultrasonic time<br>(min) |
| 10                                              | 1   | 1500                                    | 5                                           | 30                                    | 30                                      |
| 11                                              | 2   | 500                                     | 30                                          | 30                                    | 30                                      |
| 7                                               | 3   | 500                                     | 30                                          | 90                                    | 5                                       |
| 12                                              | 4   | 1500                                    | 30                                          | 30                                    | 30                                      |
| 14                                              | 5   | 1500                                    | 5                                           | 90                                    | 30                                      |
| 1                                               | 6   | 500                                     | 5                                           | 30                                    | 5                                       |
| 9                                               | 7   | 500                                     | 5                                           | 30                                    | 30                                      |

|    |    |      |    |    |    |
|----|----|------|----|----|----|
| 3  | 8  | 500  | 30 | 30 | 5  |
| 4  | 9  | 1500 | 30 | 30 | 5  |
| 2  | 10 | 1500 | 5  | 30 | 5  |
| 15 | 11 | 500  | 30 | 90 | 30 |
| 16 | 12 | 1500 | 30 | 90 | 30 |
| 6  | 13 | 1500 | 5  | 90 | 5  |
| 13 | 14 | 500  | 5  | 90 | 30 |
| 5  | 15 | 500  | 5  | 90 | 5  |
| 8  | 16 | 1500 | 30 | 90 | 5  |

Table S3. A: Design experiments and requirements used in the experimental design of SPE method.

| Name                  | Goal        | Lower Limit | Upper Limit | Lower Weight | Upper Weight | Importance |
|-----------------------|-------------|-------------|-------------|--------------|--------------|------------|
| A: V (init.) diluent  | minimize    | 5           | 7           | 1            | 1            | 3          |
| B: pH (init.) diluent | is in range | 1           | 5           | 1            | 1            | 3          |
| C: V of sample on SPE | maximize    | 1           | 3           | 1            | 1            | 3          |
| D: elution V on SPE   | minimize    | 300         | 1500        | 1            | 1            | 3          |
| % Recovery Alanine    | maximize    | 49          | 101         | 1            | 1            | 3          |
| % Recovery Histidine  | maximize    | 48          | 99          | 1            | 1            | 3          |
| % Recovery Valine     | maximize    | 47          | 101         | 1            | 1            | 3          |
| % Recovery Isoleucine | maximize    | 44          | 99          | 1            | 1            | 3          |
| % Recovery Leucine    | maximize    | 60          | 99          | 1            | 1            | 3          |

Table S3. B: Conducted experiments for the optimization of SPE method.

| 2 <sup>nd</sup> step: SPE – Experimental Design |     |                                                  |                                        |                                             |                                              |
|-------------------------------------------------|-----|--------------------------------------------------|----------------------------------------|---------------------------------------------|----------------------------------------------|
| Std                                             | Run | Factor 1<br>A: Initial volume of<br>diluent (mL) | Factor 2<br>B: pH (initial) of diluent | Factor 3<br>C: Sample volume on SPE<br>(mL) | Factor 4<br>D: Elution volume on<br>SPE (μL) |
| 11                                              | 1   | 5                                                | 5                                      | 1                                           | 1500                                         |
| 3                                               | 2   | 5                                                | 5                                      | 1                                           | 300                                          |
| 7                                               | 3   | 5                                                | 5                                      | 3                                           | 300                                          |
| 6                                               | 4   | 15                                               | 1                                      | 3                                           | 300                                          |
| 12                                              | 5   | 15                                               | 5                                      | 1                                           | 1500                                         |
| 5                                               | 6   | 5                                                | 1                                      | 3                                           | 300                                          |
| 8                                               | 7   | 15                                               | 5                                      | 3                                           | 300                                          |
| 4                                               | 8   | 15                                               | 5                                      | 1                                           | 300                                          |
| 14                                              | 9   | 15                                               | 1                                      | 3                                           | 1500                                         |
| 16                                              | 10  | 15                                               | 5                                      | 3                                           | 1500                                         |
| 10                                              | 11  | 15                                               | 1                                      | 1                                           | 1500                                         |
| 15                                              | 12  | 5                                                | 5                                      | 3                                           | 1500                                         |
| 9                                               | 13  | 5                                                | 1                                      | 1                                           | 1500                                         |
| 1                                               | 14  | 5                                                | 1                                      | 1                                           | 300                                          |
| 13                                              | 15  | 5                                                | 1                                      | 3                                           | 1500                                         |
| 2                                               | 16  | 15                                               | 1                                      | 1                                           | 300                                          |

Table S4. Intermediate precision.

| Standard        | C(added) ( $\mu\text{g mL}^{-1}$ ) | %RSD                |                     |                     |
|-----------------|------------------------------------|---------------------|---------------------|---------------------|
|                 |                                    | 1 <sup>st</sup> day | 2 <sup>nd</sup> day | 3 <sup>rd</sup> day |
| Histidine       | 0.02                               | 0.91                | 1.68                | 1.75                |
|                 | 3.0                                | 0.78                | 1.03                | 1.11                |
|                 | 5.0                                | 0.39                | 0.80                | 0.97                |
| Average (n = 9) |                                    | 0.69                | 1.17                | 1.28                |
| Alanine         | 0.01                               | 0.85                | 0.96                | 1.56                |
|                 | 1.0                                | 0.29                | 0.73                | 0.93                |
|                 | 2.0                                | 0.33                | 0.41                | 0.91                |
| Average (n = 9) |                                    | 0.49                | 0.70                | 1.13                |
| Valine          | 0.01                               | 0.71                | 0.83                | 1.35                |
|                 | 5.0                                | 0.59                | 0.80                | 1.10                |
|                 | 8.0                                | 0.51                | 0.64                | 0.97                |
| Average (n = 9) |                                    | 0.60                | 0.76                | 1.14                |
| Isoleucine      | 0.01                               | 1.25                | 1.56                | 1.70                |
|                 | 5.0                                | 1.03                | 1.22                | 1.51                |
|                 | 8.0                                | 0.87                | 0.93                | 1.22                |
| Average (n = 9) |                                    | 1.05                | 1.24                | 1.48                |
| Leucine         | 0.03                               | 0.99                | 1.20                | 1.44                |
|                 | 10.0                               | 0.93                | 1.23                | 1.76                |
|                 | 15.0                               | 0.76                | 1.05                | 1.30                |
| Average (n = 9) |                                    | 0.89                | 1.16                | 1.50                |

Table S5. Conducted experiments with Plackett-Burman design for the evaluation of the robustness.

| Design: 2 <sup>**</sup> (7-4) design (Spreadsheet1) |          |                           |           |                           |                                           |                                    |
|-----------------------------------------------------|----------|---------------------------|-----------|---------------------------|-------------------------------------------|------------------------------------|
| Standard Run                                        | CenterPt | Buffer concentration (mM) | pH Buffer | Temperature (column) (°C) | Initial concentration of methanol (% v/v) | Injection volume ( $\mu\text{L}$ ) |
| 4                                                   | 1        | 20.00000                  | 2.900000  | 24.00000                  | 40.00000                                  | 19.00000                           |
| 8                                                   | 1        | 20.00000                  | 2.900000  | 26.00000                  | 40.00000                                  | 21.00000                           |
| 3                                                   | 1        | 18.00000                  | 2.900000  | 24.00000                  | 39.00000                                  | 21.00000                           |
| 6                                                   | 1        | 20.00000                  | 2.700000  | 26.00000                  | 39.00000                                  | 21.00000                           |
| 2                                                   | 1        | 20.00000                  | 2.700000  | 24.00000                  | 39.00000                                  | 19.00000                           |
| 9 (C)                                               | 0        | 19.00000                  | 2.800000  | 25.00000                  | 39.50000                                  | 20.00000                           |
| 10 (C)                                              | 0        | 19.00000                  | 2.800000  | 25.00000                  | 39.50000                                  | 20.00000                           |
| 1                                                   | 1        | 18.00000                  | 2.700000  | 24.00000                  | 40.00000                                  | 21.00000                           |
| 5                                                   | 1        | 18.00000                  | 2.700000  | 26.00000                  | 40.00000                                  | 19.00000                           |
| 11 (C)                                              | 0        | 19.00000                  | 2.800000  | 25.00000                  | 39.50000                                  | 20.00000                           |
| 7                                                   | 1        | 18.00000                  | 2.900000  | 26.00000                  | 39.00000                                  | 19.00000                           |

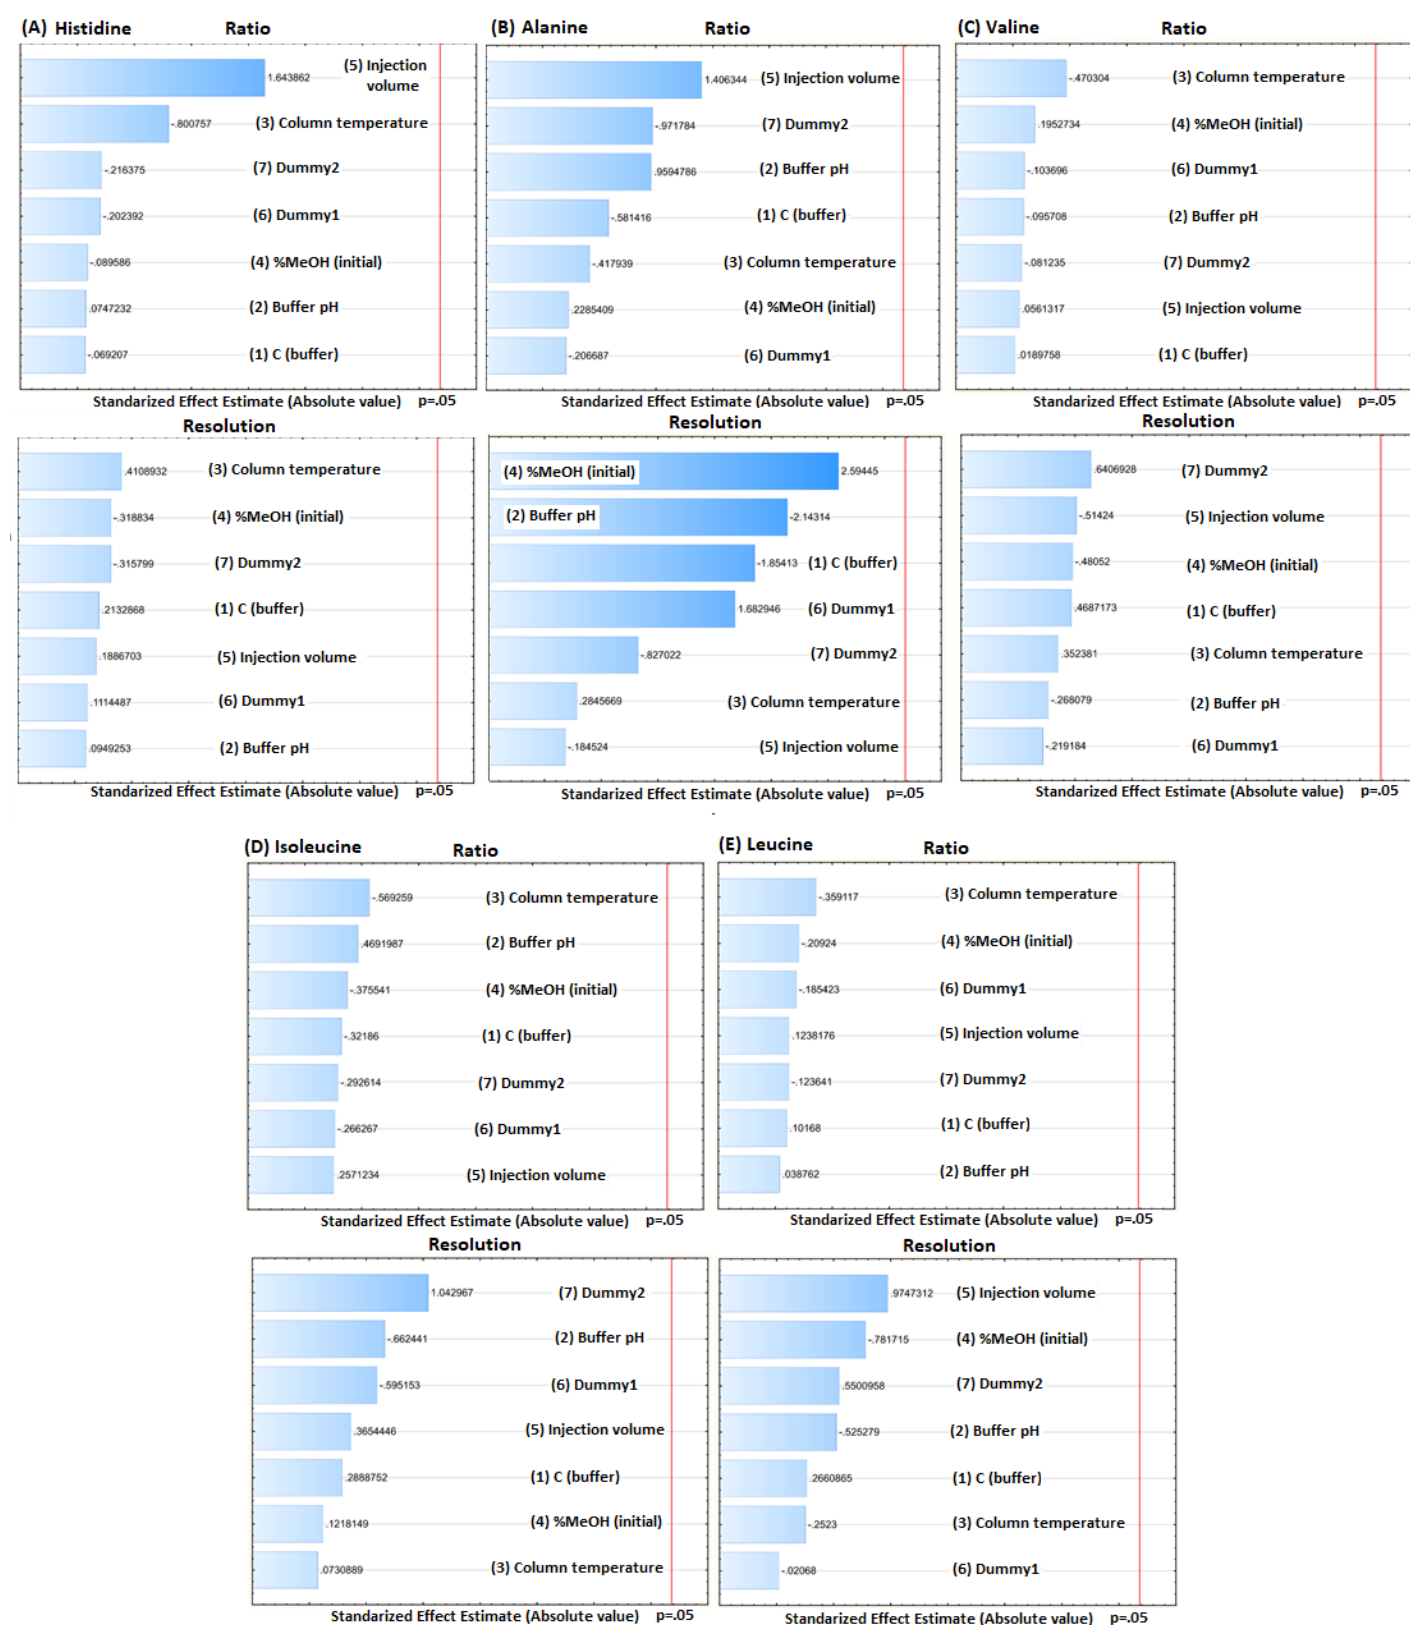

**Figure S2.** Pareto charts for the robustness test of HPLC instrumental parameters (ratio & resolution) for A) Histidine, B) Alanine, C) Valine, D) Isoleucine, E) Leucine.
